# Supplementary material
Source: PubMed Central journal article supplement (PMC9160276)
Supplement: 41422_2022_651_MOESM2_ESM.pdf [file 41422_2022_651_MOESM2_ESM.pdf]

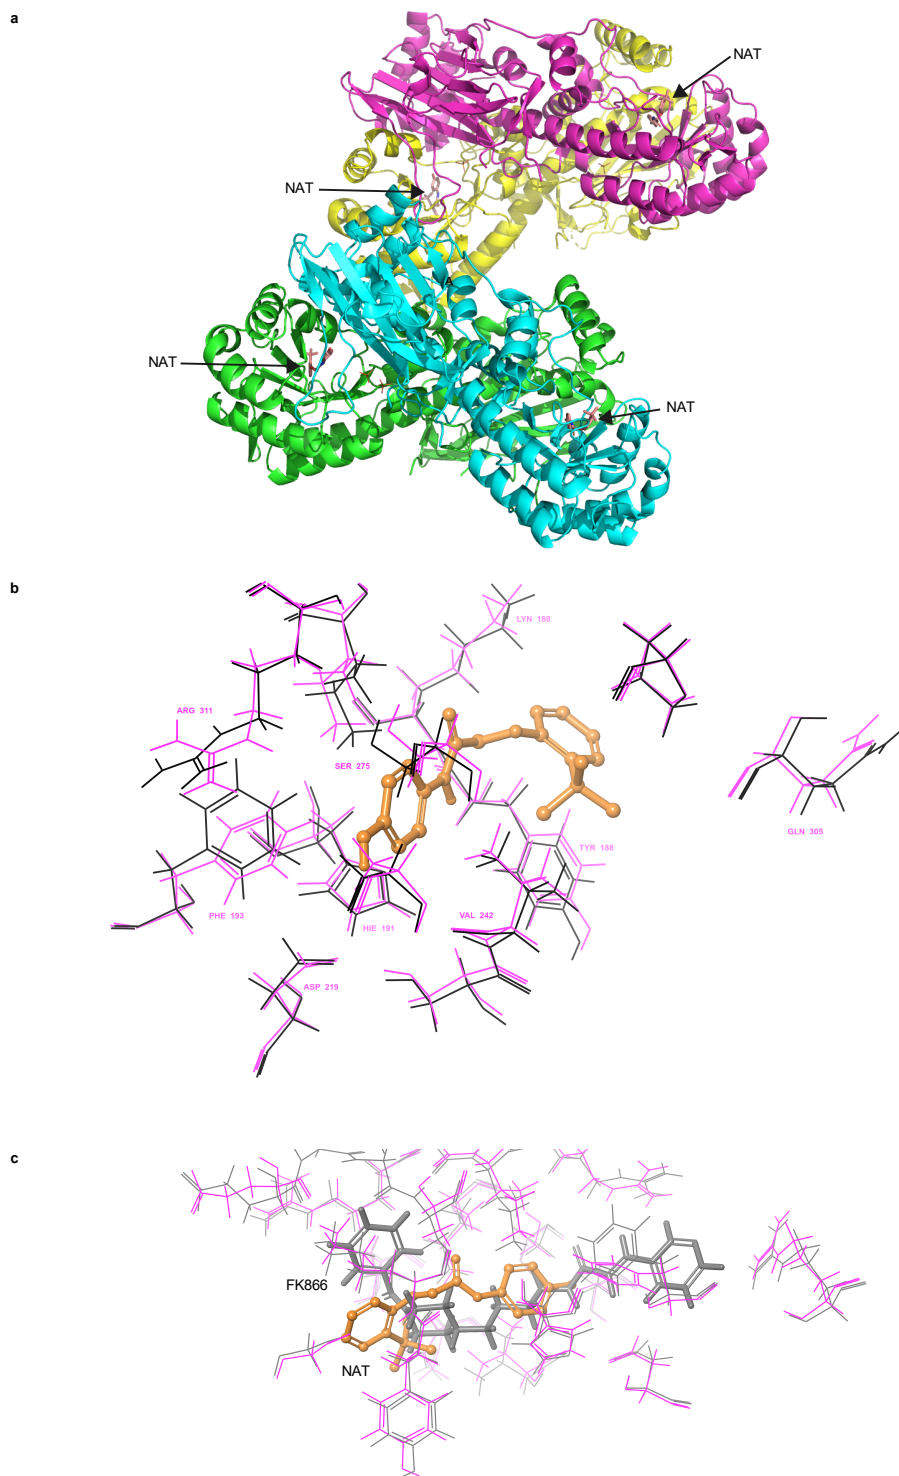

**Supplementary information, Fig. S2. The crystal structure of NAMPT bound to NAT and FK866.**

**a** The crystallographic unit contains four chains of NAMPT as ribbons in rose, yellow, green, and cyan, with one NAT molecule in each chain. NATs are shown as sticks in pink. **b** Conformational change of NAMPT around the binding site elicited by NAT. In the NAMPT-NAT

complex, NAT and NAMPT are shown as orange sticks and pink lines, respectively. NAMPT structure in the apo form is shown as black lines. The indicated residues undergo conformational changes upon NAT binding. **c** Comparison of the binding mode of NAT to NAMPT with that of FK866. NAT and FK866 are shown as sticks in orange and gray, respectively. The corresponding protein structures are shown as lines in pink and gray, respectively.
