# Supplementary material
Source: PubMed Central journal article supplement (PMC9160276)
Supplement: 41422_2022_651_MOESM3_ESM.pdf [file 41422_2022_651_MOESM3_ESM.pdf]

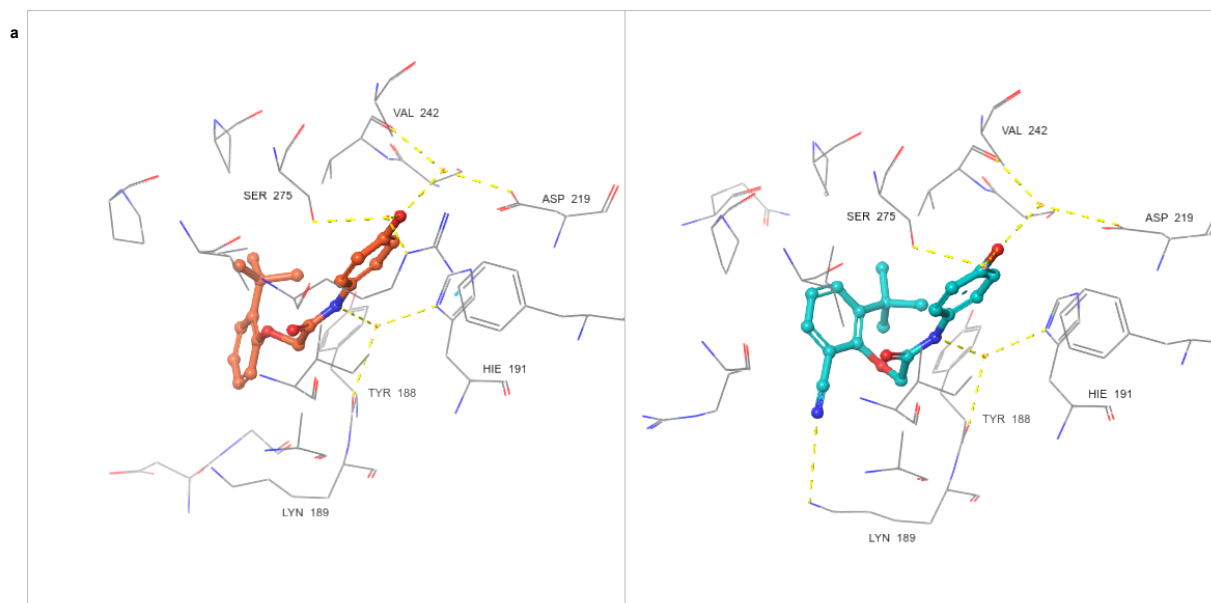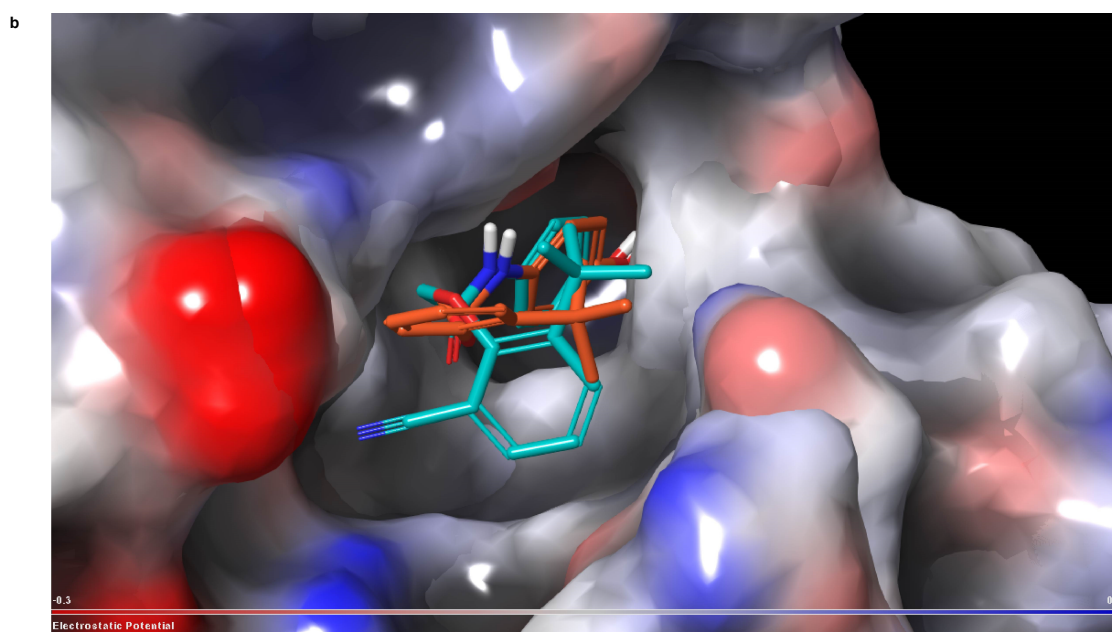

**Supplementary information, Fig. S3. Two-dimensional ligand-interaction diagrams of NAMPT bound to NAT or NAT-5r.**

**a** Left panel, NAT and its adjacent residues within 4Å in the crystal structure. Right panel, the predicted preferable binding mode of NAT-5r and adjacent residues within 4Å. H-bond interactions are shown as yellow dash lines. **b** A surface display for the NATs-binding in an internal region of the NAMPT enzyme. NAT and NAT-5r are shown as sticks in orange and cyan, respectively.
