# Supplementary material
Source: PubMed Central journal article supplement (PMC9160276)
Supplement: 41422_2022_651_MOESM5_ESM.pdf [file 41422_2022_651_MOESM5_ESM.pdf]

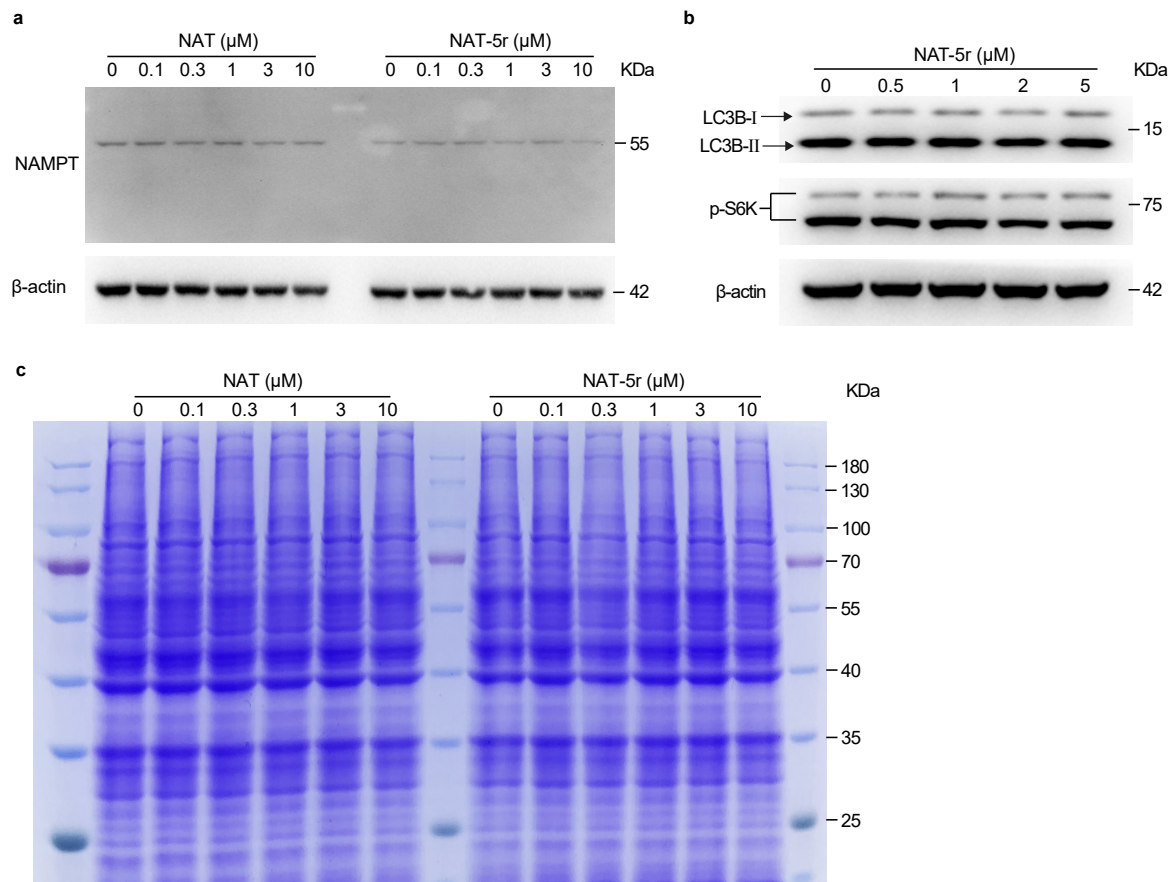

**Supplementary information, Fig. S5. Effect of NATs on cell survival.**

**a** HepG2 cells were treated as indicated for 6 h. Total cell lysates were subjected to western blotting with an anti-NAMPT antibody. Actin served as a loading control. **b** HepG2 cells were treated with NAT-5r as indicated for 6 h. Total cell lysates were subjected to western blotting with anti-LC3, anti-p-S6K, and anti-actin antibodies. **c** U2OS cells were treated as indicated for 24 h. Total cell lysates were subjected to Coomassie blue staining.
