# Supplementary material
Source: PubMed Central journal article supplement (PMC9160276)
Supplement: 41422_2022_651_MOESM6_ESM.pdf [file 41422_2022_651_MOESM6_ESM.pdf]

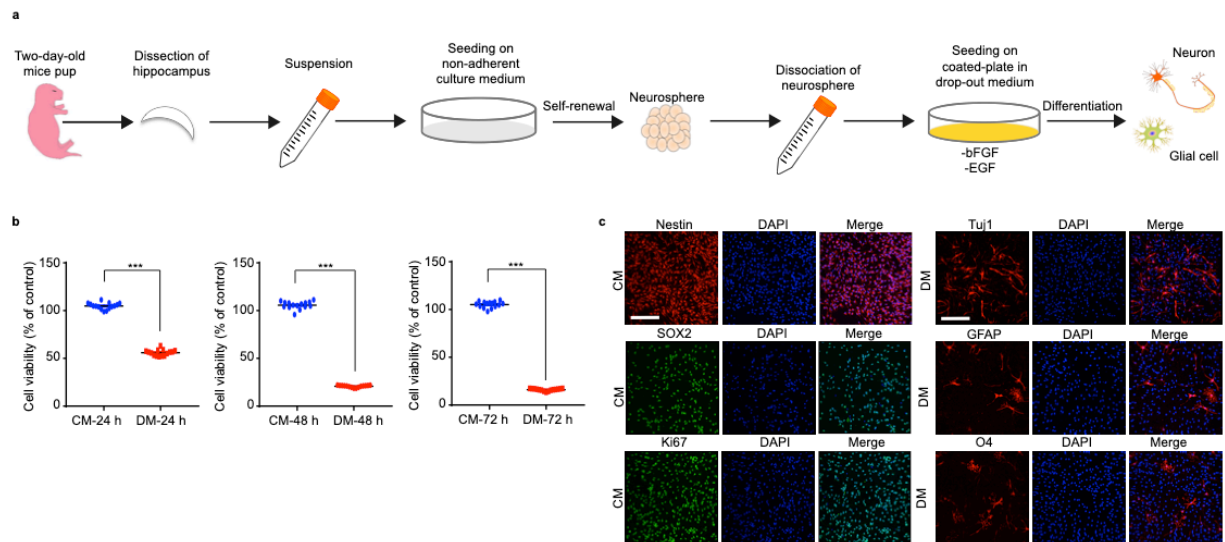

**Supplementary information, Fig. S6. Differentiation of neural stem cells in growth factors-deficient conditions.**

**a** Schematic of the procedure for isolating, culturing, and inducing differentiation of NSCs. **b** Cell viability of NSCs in the complete medium (CM) or the growth factors drop-out medium (DM) for 24 h, 48 h, and 72 h ( $n=15$  biological replicates, two-tailed  $t$ -test). **c** Representative images of NSCs. NSCs were immunostained with the Nestin, SOX2, and Ki67 antibodies. Neurons were identified as Tuj1<sup>+</sup> cells, glial cells as GFAP<sup>+</sup> cells, and oligodendrocytes as O4<sup>+</sup> cells. Nuclei were labeled with DAPI. Scale bar, 200  $\mu$ m. Error bars represent SEM. \* $p < 0.05$ ; \*\* $p < 0.01$ ; \*\*\* $p < 0.005$ .
