# Supplementary material
Source: PubMed Central journal article supplement (PMC9160276)
Supplement: 41422_2022_651_MOESM7_ESM.pdf [file 41422_2022_651_MOESM7_ESM.pdf]

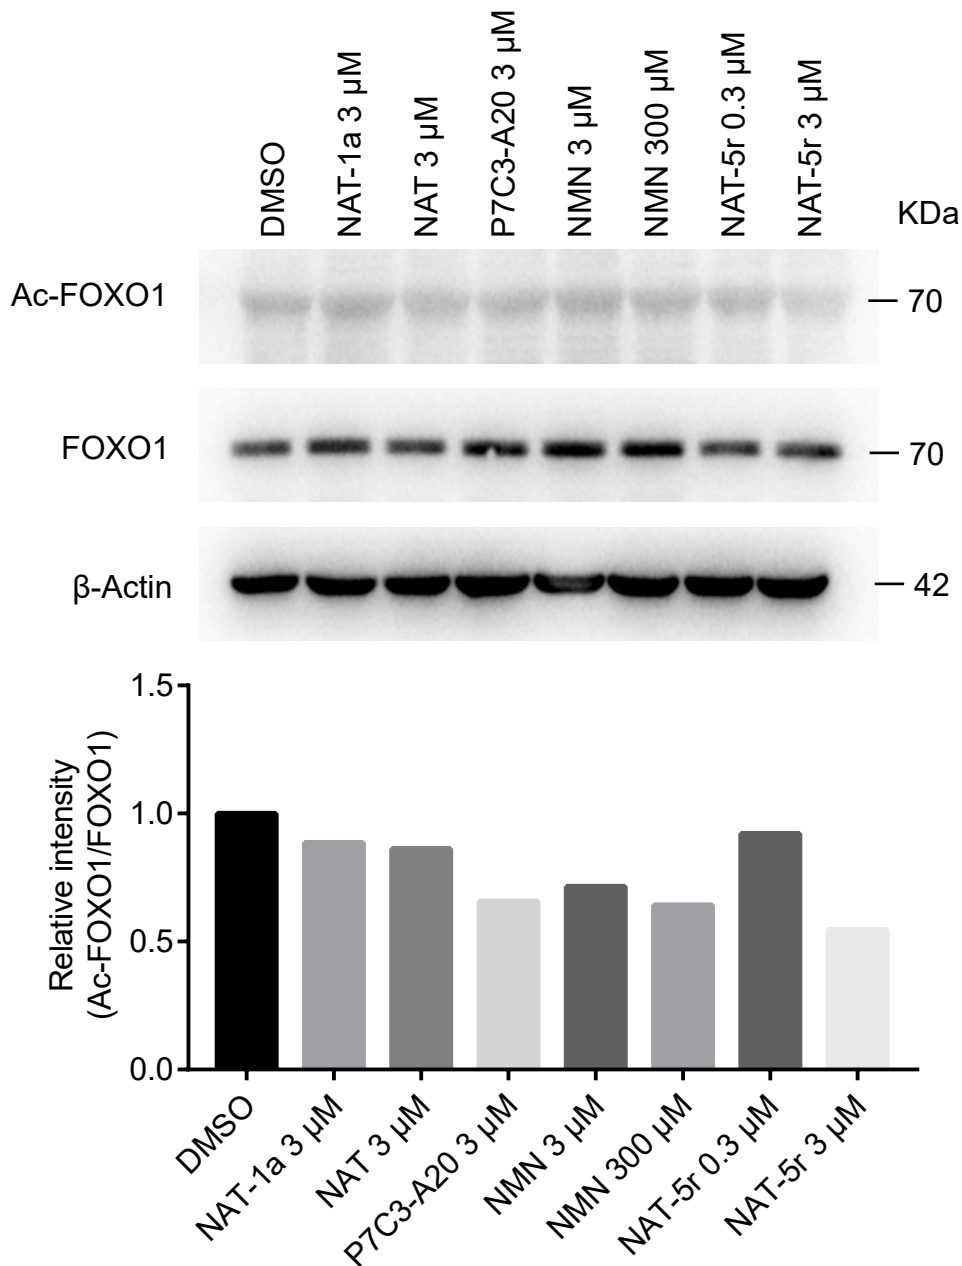

**Supplementary information, Fig. S7. Effect of NATs on the acetylation of FOXO1.**

NSCs were treated with the indicated concentrations of NAT-1a, NAT, P7C3-A20, NMN, or NAT-5r, and cultured in the growth factors drop-out medium for 3 days. The cell extracts were subjected to western blotting with antibodies against total FOXO1 or acetylated FOXO1. Actin served as a loading control. The relative intensity of Ac-FOXO1 versus FOXO1 in each sample was normalized to that of DMSO-treated control.
